# Supplementary material for: Efficient ruthenium and copper cocatalzyed five-component coupling to form dipropargyl amines under mild conditions in water
Source: Royal Society of Chemistry journal article supplement (doi:10.1039/b613596j), 2006-12-04
Supplement: b613596j.pdf [file b613596j.pdf]

# Efficient Ruthenium and Copper Cocatalyzed Five-Component Coupling to Form Dipropargyl Amines Under Mild Conditions in Water

E. Ryan Bonfield and Chao-Jun Li\*

Department of Chemistry, McGill University, 801 Sherbrooke street West, Montreal, Quebec H3A 2K6 Canada

## Supplementary Materials

### Experimental

#### **3-Phenyl-N-(3-phenylprop-2-ynyl)-N-(3-phenylpropyl)prop-2-yn-1-amine (Table 2 entry 1)**

Purification by column chromatography (0-5% EtOAc gradient,  $R_f=0.3$  in 9:1 hexanes:EtOAc) gave a pale yellow oil; IR (neat)  $\nu_{\max}$  3026, 2942, 1598, 1489, 1453, 1442, 1350, 1324 $\text{cm}^{-1}$ .  $^1\text{H}$  NMR (400MHz,  $\text{CDCl}_3$ )  $\delta$  7.42-7.40 (m, 4H), 7.27-7.13 (m, 11H), 3.71 (s, 4H), 2.72-2.67 (m, 4H), 1.89 (tt,  $J = 7.5, 7.5\text{Hz}$ , 2H);  $^{13}\text{C}$  NMR (100MHz,  $\text{CDCl}_3$ )  $\delta$  141.9, 131.7, 128.3, 128.2, 128.1, 128.0, 125.7, 123.0, 85.1, 84.6, 52.3, 43.2, 33.4, 29.0; HRMS  $m/z$  calcd for  $\text{C}_{27}\text{H}_{24}\text{N}$  ( $\text{M-H}^+$ ) 362.1909, found 362.1901.

#### **N,N-Bis(3-phenylprop-2-ynyl)butan-1-amine (Table 2, entry 2)**

Purification by column chromatography (99:1 hexanes:EtOAc,  $R_f=0.4$  in 9:1 hexanes:EtOAc) gave a pale yellow oil; IR (neat)  $\nu_{\max}$  3033, 2956, 2931, 1598, 1489, 1442, 1359, 1324 $\text{cm}^{-1}$ .  $^1\text{H}$  NMR (400MHz,  $\text{CDCl}_3$ )  $\delta$  7.49-7.44 (m, 4H), 7.32-7.29 (m, 6H), 3.74 (s, 4H), 2.70 (t,  $J = 7.4\text{Hz}$ , 2H), 1.62-1.54 (m, 2H), 1.43 (tt,  $J = 7.4, 7.4\text{Hz}$  2H), 0.98 (t,  $J = 7.2\text{Hz}$ , 3H);  $^{13}\text{C}$  NMR (100MHz,  $\text{CDCl}_3$ )  $\delta$  131.9, 128.3, 128.1, 123.3, 85.1, 84.9, 53.0, 43.4, 29.8, 20.7, 14.1; HRMS  $m/z$  calcd for  $\text{C}_{22}\text{H}_{22}\text{N}$  ( $\text{M-H}^+$ ) 300.1752, found 300.1750.

#### **N,N-Bis(3-phenylprop-2-ynyl)benzenamine (Table 2, entry 3)**

Purification by column chromatography (0-1% EtOAc gradient,  $R_f = 0.5$  in 9:1 hexanes:EtOAc) gave pale yellow oil; IR (neat)  $\nu_{\max}$  3060, 1682, 1597, 1504, 1489, 1442, 1346, 1224 $\text{cm}^{-1}$ .  $^1\text{H}$  NMR (400MHz,  $\text{CDCl}_3$ )  $\delta$  7.40-7.36 (m, 4H), 7.33-7.20 (m, 8H), 7.07-7.04 (m, 2H), 6.88 (tt,  $J = 7.2, 1.0\text{Hz}$ , 1H), 4.38 (s, 4H);  $^{13}\text{C}$  NMR (100MHz,  $\text{CDCl}_3$ )  $\delta$  148.3, 131.9, 129.2, 128.3, 128.3, 123.0, 119.6, 116.0, 85.2, 84.7, 41.5; HRMS  $m/z$  calcd for  $\text{C}_{24}\text{H}_{18}\text{N}$  ( $\text{M-H}^+$ ) 320.1439, found 320.1436.

#### **N,N-Di(hept-2-ynyl)benzenamine (Table 2, entry 4)**

Purification by column chromatography (0-1% EtOAc gradient,  $R_f = 0.7$  in 9:1 hexanes:EtOAc) gave a colourless oil; IR (neat)  $\nu_{\max}$  2957, 2932, 1600, 1504, 1456, 1366, 1328, 1221 $\text{cm}^{-1}$ .  $^1\text{H}$  NMR (400MHz,  $\text{CDCl}_3$ )  $\delta$  7.27-7.23 (m, 2H), 6.95 (d,  $J = 6.6, 2\text{Hz}$ ), 6.83 (t,  $J = 7.2\text{Hz}$ , 1H), 4.06 (t,  $J = 2.0\text{Hz}$ , 4H), 2.18-2.14 (m, 4H), 1.49-1.32 (m, 8H), 0.88 (t,  $J = 7.4\text{Hz}$ , 6H);  $^{13}\text{C}$  NMR (100MHz,  $\text{CDCl}_3$ )  $\delta$  148.5, 128.9, 119.1, 115.8,

84.7, 75.5, 40.7, 30.8, 21.9, 18.4, 13.6; HRMS  $m/z$  calcd for  $C_{20}H_{26}N$  ( $M-H^+$ ) 280.2065, found 280.2063.

**4-Methoxy-N,N-bis(3-phenylprop-2-ynyl)benzenamine (Table 2, entry 5)**

Purification by column chromatography (0-2% EtOAc gradient,  $R_f$  0.3 in 9:1 hexanes:EtOAc) gave a pale yellow oil; IR (neat)  $\nu_{max}$  3055, 2932, 2833, 1735, 1598, 1511, 1489, 1442, 1246, 1028  $cm^{-1}$ .  $^1H$  NMR (400MHz,  $CDCl_3$ )  $\delta$  7.40-7.34 (m, 4H), 7.29-7.22 (m, 6H), 7.09-7.05 (m, 2H), 6.90-6.84 (m, 2H), 4.30 (s, 4H), 3.76 (s, 3H);  $^{13}C$  NMR (400MHz,  $CDCl_3$ )  $\delta$  154.2, 142.7, 131.8, 128.2, 128.1, 123.0, 119.3, 114.4, 85.1, 84.9, 55.6, 42.6; HRMS  $m/z$  calcd for  $C_{25}H_{21}NO$  ( $M^+$ ) 351.1623, found 351.1610, for  $C_{25}H_{20}NO$  ( $M-H^+$ ) 350.1545, found 350.1540.

**4-Methyl-N,N-bis(3-phenylprop-2-ynyl)benzenamine (Table 2, entry 6)**

Purification by column chromatography (0-1% EtOAc gradient,  $R_f=0.4$  in 9:1 hexanes:EtOAc) gave a yellow oil; IR (neat)  $\nu_{max}$  3032, 2920, 1616, 1598, 1519, 1489, 1442, 1366, 1335, 1233, 1207, 1155, 1070, 1028  $cm^{-1}$ .  $^1H$  NMR (400MHz,  $CDCl_3$ )  $\delta$  7.39-7.34 (m, 4H), 7.26-7.20 (m, 6H), 7.11-7.08 (m, 2H), 6.98 (dt,  $J = 8.4, 2.2$ Hz, 2H), 4.34 (s, 4H), 2.27 (s, 3H);  $^{13}C$  NMR (100MHz,  $CDCl_3$ )  $\delta$  146.1, 131.7, 129.6, 129.1, 128.1, 128.0, 123.0, 116.6, 85.1, 84.6, 41.7, 20.4; HRMS  $m/z$  calcd for  $C_{25}H_{21}NO$  ( $M-H^+$ ) 334.1596, found 334.1591.

**N,N-Bis(3-phenylprop-2-ynyl)cyclopentanamine (Table 2, entry 7)**

Purification by column chromatography (1-2% EtOAc gradient,  $R_f=0.3$  in 9:1 hexanes:EtOAc) gave a colourless oil; IR (neat)  $\nu_{max}$  3055, 2956, 2869, 2805, 1598, 1489, 1442, 1349, 1324,  $cm^{-1}$ .  $^1H$  NMR (400MHz,  $CDCl_3$ )  $\delta$  7.43 (s, 4H), 7.28 (d,  $J = 2.8$ Hz, 6H), 3.82 (s, 4H), 3.03 (tt,  $J = 8.0, 8.0$ Hz, 1H), 2.04-1.93 (m, 2H), 1.8-1.72 (m, 2H), 1.66-1.44 (m, 4H);  $^{13}C$  NMR (100MHz,  $CDCl_3$ )  $\delta$  131.7, 128.1, 127.9, 123.2, 84.9, 84.8, 62.9, 42.1, 31.4, 24.0; HRMS  $m/z$  calcd for  $C_{23}H_{22}N$  ( $M-H^+$ ) 312.1752, found 312.1750.

**N,N-Bis(3-phenylprop-2-ynyl)prop-2-en-1-amine (Table 2, entry 8)**

Purification by column chromatography (0-1% EtOAc gradient,  $R_f=0.2$  in 9:1 hexanes:EtOAc) gave a colourless oil; IR (neat)  $\nu_{max}$  3079, 2918, 2813, 1598, 1489, 1442, 1363, 1326, 1252, 1108  $cm^{-1}$ .  $^1H$  NMR (400MHz,  $CDCl_3$ )  $\delta$  7.47-7.42 (m, 4H), 7.30-7.27 (m, 6H), 5.92 (ddt,  $J = 17.2, 10.4, 6.8$ Hz, 1H), 5.35 (ddt,  $J = 17.2, 1.6, 1.6$ Hz, 1H), 5.22 (dm,  $J = 10.0$ Hz, 1H), 3.72 (s, 4H), 3.32 (dt,  $J = 6.8, 1.2$ Hz, 2H);  $^{13}C$  NMR (100MHz,  $CDCl_3$ )  $\delta$  135.0, 131.8, 128.3, 128.1, 123.2, 118.8, 85.3, 84.6, 56.5, 42.9; HRMS  $m/z$  calcd for  $C_{21}H_{18}N$  ( $M-H^+$ ) 284.1439, found 284.1437.

**N-Methyl-3-phenyl-N-(3-phenylprop-2-ynyl)prop-2-yn-1-amine (Table 2, entry 9)**

Purification by column chromatography (0-5% EtOAc gradient,  $R_f = 0.5$  in 7:3 hexanes:EtOAc) gave an orange oil; IR (neat)  $\nu_{max}$  3056, 2944, 2866, 2790, 1598, 1489, 1442, 1361, 1326  $cm^{-1}$ .  $^1H$  NMR (400MHz,  $CDCl_3$ )  $\delta$  7.48-7.46 (m, 4H), 7.33-7.30 (m, 6H), 3.67 (s, 4H), 2.53 (s, 3H);  $^{13}C$  NMR (100MHz,  $CDCl_3$ )  $\delta$  131.8, 128.3, 128.1, 123.1, 85.3, 84.6, 45.6, 41.5; HRMS  $m/z$  calcd for  $C_{19}H_{16}N$  ( $M-H^+$ ) 258.1283, found 258.1285.
